# Supplementary material for: Cauda epididymal sperm aspiration as a novel approach for spinal cord injury-associated azoospermia
Source: Research Square preprint supplement (doi:10.21203/rs.3.rs-7709090/v1), 2025-10-15
Supplement: Supplementary file 1 [file fc2d34efbc9c00a10a5dab4e.pdf]

**Supplemental Figure:**

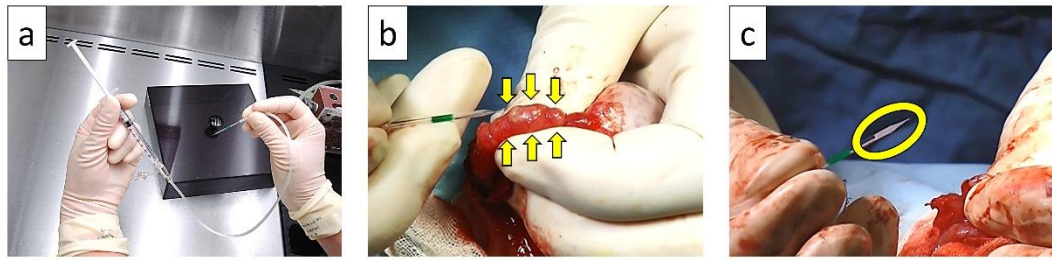

**Supplemental Figure 1. Procedure of Cauda Epididymal Sperm Aspiration (CESA).** a: Device used for CESA. A homemade glass pipette with an attached tube, fitted onto a 1-cc syringe. b: Just before inserting the tip of the glass pipette. c: A sufficient volume of whitish epididymal fluids collected inside the pipette.

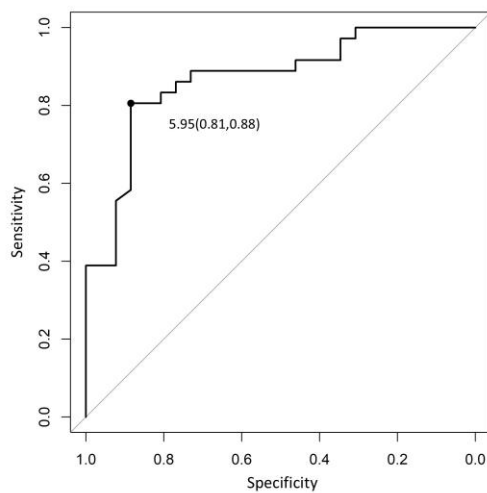

**Supplemental Figure 2. Receiver operating characteristic curve analysis.** Evaluation of the predictive value of FSH for sperm retrieval using Receiver operating characteristic curve analysis.

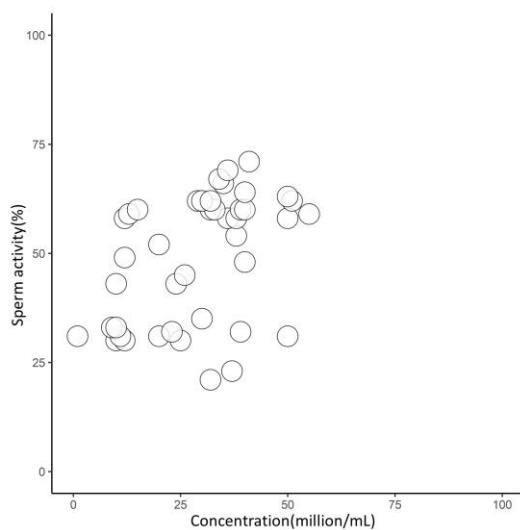

**Supplemental Figure 3. The distribution of sperm findings collected at Cauda Epididymal Sperm Aspiration (CESA).** Bubble plot showing the relationship between sperm concentration (million/mL) and sperm motility (%). The median concentration and motility of sperm findings were 32 million/mL and 56%, respectively.
